# Supplementary material
Source: MDPI journal article supplement (https://www.mdpi.com/2071-1050/15/13/10731)

**Supplementary material Figure S1.** The relative abundance of fungal communities at the class (a), order (b), and family (c) level in different walnut orchards.

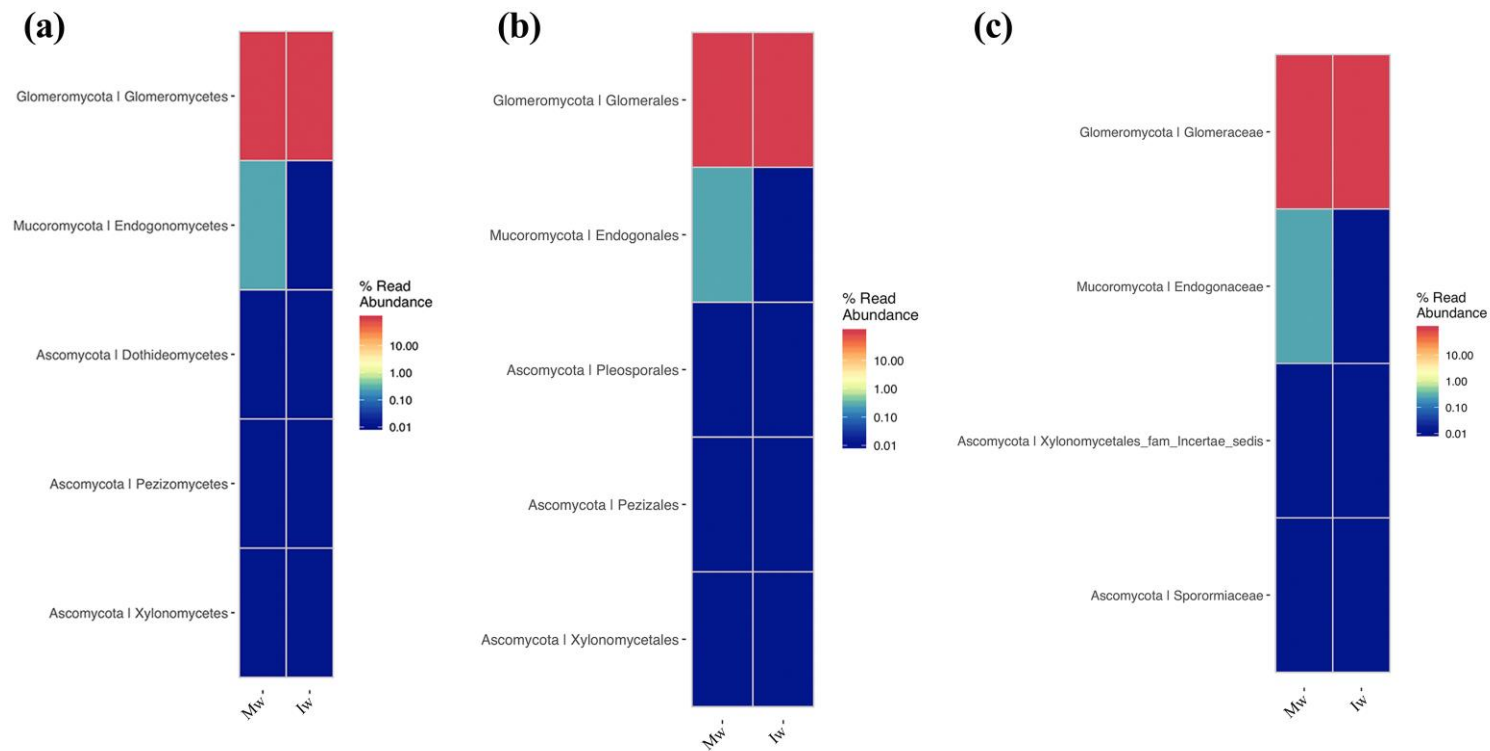

Supplement: s1 [file s1]
